# Supplementary material for: Right Heart Catheterization in Cardiogenic Shock Is Associated With Improved Outcomes: Insights From the Nationwide Readmissions Database
Source: PubMed Central journal article supplement — J Am Heart Assoc. 2021 Aug 21;10(17):e019843. doi: 10.1161/JAHA.120.019843 (PMC8649238; doi:10.1161/jaha.120.019843), 2021-08-21

# **SUPPLEMENTAL MATERIAL**

**Table S1. Baseline hospital and patient characteristics excluding cardiac arrest.**

| <b>Demographics</b>                | <b>Total<br/>N= 202593</b> | <b>Non-RHC<br/>N=178852</b> | <b>RHC<br/>N=23740</b> | <b>P value</b> |
|------------------------------------|----------------------------|-----------------------------|------------------------|----------------|
| <b>Demographics</b>                |                            |                             |                        |                |
| Mean age [y (SD)]                  | 66.9 (14.4)                | 67.6 (14.2)                 | 61.5 (14.5)            | <0.001         |
| Women (%)                          | 38.1                       | 38.9                        | 31.8                   | <0.001         |
| <b>Elixhauser score (mean)</b>     | 20.9 (10.1)                | 20.6(10.2)                  | 23.9(9.5)              | <0.001         |
| <b>Presentation</b>                |                            |                             |                        |                |
| Acute Coronary Syndrome (%)        | 44.0                       | 45.7                        | 31.4                   | <0.001         |
| STEMI (%)                          | 12.8                       | 13.2                        | 10.0                   | <0.001         |
| NSTEMI (%)                         | 24.3                       | 25.2                        | 17.6                   | <0.001         |
| <b>Comorbidities</b>               |                            |                             |                        |                |
| Congestive heart failure (%)       | 76.8                       | 74.6                        | 93.4                   | <0.001         |
| Cardiac arrhythmias (%)            | 66.7                       | 65.8                        | 73.9                   | <0.001         |
| Valvular heart disease (%)         | 28.2                       | 26.7                        | 39.1                   | <0.001         |
| Pulmonary circulation disorder (%) | 22.2                       | 19.7                        | 40.4                   | <0.001         |
| Chronic Pulmonary disease (%)      | 28.5                       | 28.7                        | 26.4                   | <0.001         |
| Peripheral vascular disease (%)    | 22.8                       | 21.4                        | 32.9                   | <0.001         |
| Hypertension (%)                   | 74.6                       | 74.4                        | 75.5                   | 0.09           |
| Renal failure (%)                  | 40.5                       | 39.3                        | 50.0                   | <0.001         |
| Diabetes, uncomplicated (%)        | 15.0                       | 15.1                        | 14.4                   | 0.08           |
| Diabetes, complicated (%)          | 26.4                       | 26.0                        | 29.5                   | <0.001         |
| Obesity (%)                        | 17.0                       | 16.7                        | 19.4                   | <0.001         |
| Liver Disease (%)                  | 20.2                       | 19.6                        | 24.3                   | <0.001         |
| Electrolyte disorder (%)           | 67.4                       | 66.7                        | 72.4                   | <0.001         |
| Deficiency anemia (%)              | 5.4                        | 5.0                         | 7.9                    | <0.001         |
| Alcohol abuse (%)                  | 6.1                        | 6.1                         | 6.0                    | 0.94           |
| Length of stay (days)              | 14.9 (15.9)                | 13.7(14.6)                  | 22.5(20.8)             | <0.001         |
| Mechanical ventilation (%)         | 43.3                       | 44.2                        | 36.2                   | <0.001         |
| Acute kidney injury (%)            | 63.5                       | 62.1                        | 73.6                   | <0.001         |
| Left heart catheterization (%)     | 32.9                       | 32.7                        | 34.7                   | 0.02           |

|                                            |               |          |          |        |
|--------------------------------------------|---------------|----------|----------|--------|
| Percutaneous coronary intervention (%)     | 19.6          | 20.0     | 16.0     | <0.001 |
| Intra-aortic Balloon pump (%)              | 16.5          | 15.3     | 25.8     | <0.001 |
| Percutaneous ventricular assist device (%) | 4.6           | 4.0      | 8.6      | <0.001 |
| Extracorporeal life support (%)            | 2.3           | 2.2      | 3.6      | <0.001 |
| Orthotopic heart transplantation (%)       | 1.0           | 0.4      | 5.0      | <0.001 |
| Left ventricular assist device (%)         | 2.0           | 1.0      | 9.4      | <0.001 |
| <b>Primary insurance</b>                   |               |          |          |        |
| Medicare (%)                               | 64.6          | 65.7     | 56.8     | <0.001 |
| Medicaid (%)                               | 11.1          | 10.7     | 14.3     | <0.001 |
| Private insurance (%)                      | 18.1          | 17.3     | 23.6     | <0.001 |
| Self-pay (%)                               | 2.7           | 2.8      | 2.1      | <0.001 |
| No Charge (%)                              | 0.2           | 0.2      | 0.2      | 0.50   |
| Other (%)                                  | 2.9           | 2.9      | 2.6      | 0.16   |
| <b>Hospital Characteristics</b>            |               |          |          |        |
| <b>Hospital Size</b>                       |               |          |          |        |
| Small (%)                                  | 9.2           | 9.9      | 4.2      | <0.001 |
| Medium (%)                                 | 22.7          | 23.9     | 13.9     | <0.001 |
| Large (%)                                  | 67.9          | 66.1     | 81.7     | <0.001 |
| Hospital case volume (mean)(SD)            | 352.5 (500.3) | 325(475) | 558(617) | <0.001 |
| <b>Hospital type</b>                       |               |          |          |        |
| Metropolitan non-teaching (%)              | 18.5          | 20.1     | 6.4      | <0.001 |
| Metropolitan teaching (%)                  | 77.3          | 75.3     | 92.2     | <0.001 |
| Non-metropolitan hospital (%)              | 4.1           | 4.5      | 1.3      | <0.001 |

NSTEMI=Non-ST elevation myocardial infarction, RHC=Right Heart Catheterization, STEMI= ST elevation myocardial infarction

**Table S2. Index admission in-hospital outcomes and therapies for patients without cardiac arrest.**

| <b>Outcomes</b>  | <b>Total<br/>N= 202592</b> | <b>Non-RHC<br/>N=178852</b> | <b>RHC<br/>N=23740</b> | <b>P value</b> |
|------------------|----------------------------|-----------------------------|------------------------|----------------|
| Death (%)        | 33.6                       | 35.0                        | 23.4                   | <0.001         |
| Stroke (%)       | 3.7                        | 3.8                         | 3.2                    | 0.004          |
| Hemodialysis (%) | 2.6                        | 2.5                         | 3.2                    | 0.015          |

RHC =Right Heart Catheterization

**Table S3. In hospital comparison of outcomes in patients who did not receive LVAD/OHT.**

| <b>Outcomes</b>       | <b>Non-RHC<br/>N=207406</b> | <b>RHC<br/>N=22319</b> | <b>P value</b> |
|-----------------------|-----------------------------|------------------------|----------------|
| Death (%)             | 39.7%                       | 28.7%                  | <0.001         |
| Hemodialysis (%)      | 3.1%                        | 4.1%                   | 0.01           |
| Length of Stay (days) | 13.7(6.85)                  | 18.3(7.45)             | <0.001         |

RHC= right heart catheterization, LVAD/OHT= Left ventricular assist device/Orthotopic heart transplant

**Table S4. Index admission in-hospital outcomes and therapies.**

| Outcomes                   | Teaching hospital<br>(N=182211) |                  |        | Non-teaching hospital<br>(N=44580) |                 | P value |
|----------------------------|---------------------------------|------------------|--------|------------------------------------|-----------------|---------|
|                            | Non-RHC<br>(N=158420)           | RHC<br>(N=23791) |        | Non-RHC<br>(N=42878)               | RHC<br>(N=1702) |         |
| Death (%)                  | 39.0%                           | 25.3%            | <0.001 | 40.9%                              | 31.7%           | <0.001  |
| Stroke (%)                 | 4.2%                            | 3.4%             | 0.001  | 3.1%                               | 3.2%            | <0.001  |
| Hemodialysis (%)           | 3.2%                            | 3.8%             | 0.07   | 2.8%                               | 3.2%            | 0.53    |
| Mechanical ventilation (%) | 49.9%                           | 38.6%            | <0.001 | 51.8%                              | 51.0%           | 0.69    |
| Length of stay (days)      | 15.2 (16.0)                     | 23.2 (21.3)      | <0.001 | 11.6 (11.5)                        | 16.1(16.3)      | <0.001  |

RHC= right heart catheterization

**Table S5. Comparison of index hospital outcomes of propensity matched patients.**

| <b>Outcomes</b> | <b>Non-RHC<br/>N=25787</b> | <b>RHC<br/>N=25486</b> | <b>Odds Ratio</b> | <b>P value</b> |
|-----------------|----------------------------|------------------------|-------------------|----------------|
| Death (%)       | 33.1%                      | 25.8%                  | 0.69 (0.65-0.72)  | <0.001         |

RHC= right heart catheterization

**Table S6. Baseline comparison and outcomes of propensity matched patients.**

| <b>Demographics</b>                | <b>Non-RHC<br/>N=25787</b> | <b>RHC<br/>N=25486</b> |
|------------------------------------|----------------------------|------------------------|
| Mean age [y (SD)]                  | 61.5                       | 61.5                   |
| Women (%)                          | 31.4%                      | 31.7%                  |
| <b>Hospital Characteristics</b>    |                            |                        |
| <b>Hospital Size</b>               |                            |                        |
| Small (%)                          | 3.4%                       | 4.2%                   |
| Medium (%)                         | 14.5%                      | 14.6%                  |
| Large (%)                          | 81.9%                      | 81.0%                  |
| Hospital case volume (mean)        |                            |                        |
| <b>Hospital type</b>               |                            |                        |
| Metropolitan non-teaching (%)      | 10.1%                      | 6.5%                   |
| Metropolitan teaching (%)          | 82.8%                      | 92.1%                  |
| Non-metropolitan hospital (%)      | 6.9%                       | 1.3%                   |
| <b>Elixhauser score (mean)</b>     | 23.7(9.8)                  | 24.0(9.5)              |
| <b>Presentation</b>                |                            |                        |
| Acute Coronary Syndrome (%)        | 34.0%                      | 33.0%                  |
| STEMI (%)                          | 9.8%                       | 11.0%                  |
| NSTEMI (%)                         | 20.4%                      | 18.1%                  |
| <b>Comorbidities</b>               |                            |                        |
| Congestive heart failure (%)       | 91.6%                      | 92.8%                  |
| Cardiac arrhythmias (%)            | 67.4%                      | 74.7%                  |
| Valvular heart disease (%)         | 37.3%                      | 38.2%                  |
| Pulmonary circulation disorder (%) | 38.7%                      | 39.4%                  |
| Chronic Pulmonary disease (%)      | 25.6%                      | 26.3%                  |
| Peripheral vascular disease (%)    | 22.9%                      | 32.2%                  |
| Hypertension (%)                   | 74.9%                      | 75.2%                  |
| Renal failure (%)                  | 48.2%                      | 49.1%                  |
| Diabetes, uncomplicated (%)        | 14.2%                      | 14.4%                  |
| Diabetes, complicated (%)          | 29.6%                      | 29.7%                  |



|                          |       |       |
|--------------------------|-------|-------|
| Obesity (%)              |       |       |
| Liver Disease (%)        | 25.4% | 25.3% |
| Electrolyte disorder (%) |       |       |
| Coagulopathy (%)         | 31.4% | 31.9% |
| Deficiency anemia (%)    | 19.4% | 19.6% |
| Alcohol abuse (%)        | 72.1% | 73.1% |
| Depression (%)           | 11.3% | 13.4% |

---

NSTEMI=Non-ST elevation myocardial infarction, RHC=Right Heart Catheterization, STEMI= ST elevation myocardial infarction

**Table S7. Outcomes and therapies for patient without cardiac arrest during readmission.**

| <b>Outcomes</b>                            | <b>Total<br/>N= 134279</b> | <b>Non-RHC<br/>N=116113</b> | <b>RHC<br/>N=18166</b> | <b>P value</b> |
|--------------------------------------------|----------------------------|-----------------------------|------------------------|----------------|
| 30-day readmission rate (%)*               | 19.7                       | 19.9                        | 18.7                   | 0.03           |
| Time to readmission [d, mean (SD)]         | 11.7(8.4)                  | 11.5(8.4)                   | 12.7(8.3)              | <0.001         |
| Death on readmission hospitalization (%)   | 9.3                        | 9.6                         | 8.0                    | 0.03           |
| Intra-aortic Balloon pump (%)              | 1.3                        | 1.1                         | 3.0                    | <0.001         |
| Percutaneous ventricular assist device (%) | 0.4                        | 0.40                        | 0.10                   | 0.09           |
| Extracorporeal life support (%)            | 0.3                        | 0.2                         | 0.9                    | 0.01           |
| OHT (%)                                    | 0.3                        | 0.15                        | 1.3                    | 0.001          |
| LVAD (%)                                   | 1.1                        | 0.5                         | 4.4                    | <0.001         |

RHC =Right Heart Catheterization, d=days, MCS=Mechanical circulatory support, RHC=Right Heart Catheterization, SD=standard deviation. \*Only unplanned readmissions included.

**Table S8. Causes of readmission.**

| <b>Primary cause of readmission</b> | <b>Total<br/>N=160,547</b> | <b>Non-RHC<br/>N=124,727</b> | <b>RHC<br/>N=17,910</b> | <b>P<br/>value</b> |
|-------------------------------------|----------------------------|------------------------------|-------------------------|--------------------|
| Cardiogenic shock                   | 0.32%                      | 0.32%                        | 0.34%                   | 0.87               |
| Heart failure                       | 13.4%                      | 12.6%                        | 17.8%                   | <0.001             |
| Acute Kidney Injury                 | 3.01%                      | 3.1%                         | 2.5%                    | 0.09               |

RHC=Right heart catheterization

**Figure S1. Graphical representation of absolute standardized differences across different covariates used for propensity matching cohort.**

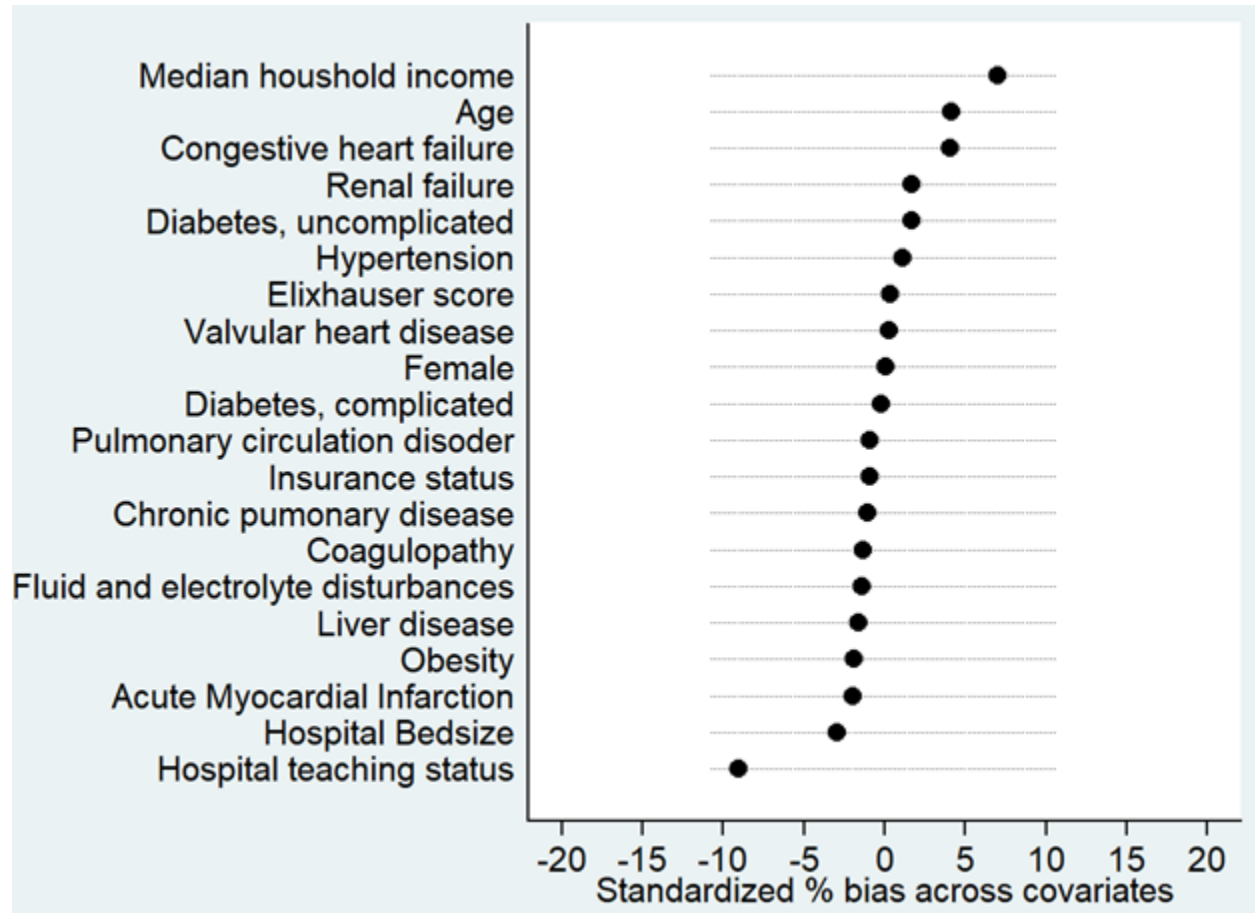

Supplement: JAH3-10-e019843-s001.pdf [file JAH3-10-e019843-s001.pdf]
